# Supplementary material
Source: PubMed Central journal article supplement (PMC2941023)
Supplement: mmc1.pdf [file mmc1.pdf]

Biophysical Journal, Volume 99

**Supporting Material**

**Solid-state NMR characterization of gas vesicle structure**

Astrid C. Sivertsen, Marvin J. Bayro, Marina Belenky, Robert G. Griffin, and Judith Herzfeld

**Supplementary material for  
Solid-state NMR characterization of gas vesicle structure  
by  
Sivertsen, Bayro, Belenky, Griffin, and Herzfeld**

**Table S1. Chemical shifts of the residues in GvpA.**

| Res | CO    | CA   | CB   | N     | Side-chain                              |
|-----|-------|------|------|-------|-----------------------------------------|
| A01 | 173.7 | 52.1 | 20.5 | 43.4  |                                         |
| V02 | 177.0 | 62.7 | 32.2 | 125.4 | CG1: 23.0, CG2: 22.0                    |
| E03 | 175.5 | 57.1 | 31.4 | 136.7 |                                         |
| S09 | 174.2 | 58.6 | 66.9 | 118.7 |                                         |
| S10 | 175.9 | 57.9 | 65.8 | 121.2 |                                         |
| L11 | 178.4 | 58.5 | 41.7 | 124.0 | CG: 27.8, CD1: 27.5, CD2: 27.2          |
| A12 | 180.1 | 56.1 | 18.6 | 123.9 |                                         |
| E13 | 180.0 | 59.9 | 30.5 | 120.2 |                                         |
| V14 | 178.3 | 67.5 | 32.3 | 123.7 | CG1: 23.9, CG2: 21.7                    |
| I15 | 178.3 | 67.6 | 39.0 | 122.5 | CD1: 14.0, CG1: 31.7, CG2: 18.3         |
| D16 | 180.2 | 58.6 | 41.7 | 120.2 |                                         |
| R17 | 180.8 | 59.9 | 31.8 | 120.3 | CG: 28.2, CD: 45.1, CZ: 160.5, NE: 88.4 |
| I18 | 177.9 | 66.1 | 39.0 | 123.3 | CG1: 30.5, CG2: 19.8, CD1: 15.1         |
| L19 | 176.2 | 55.7 | 42.1 | 122.3 | CG: 27.7                                |
| D20 | 180.3 | 57.7 | 41.5 | 121.7 |                                         |
| K21 | 180.0 | 59.5 | 34.0 | 122.4 | CG: 26.1                                |
| G22 | 170.9 | 44.9 |      | 115.1 |                                         |
| I23 | 175.3 | 62.2 | 43.1 | 118.0 | CD1: 14.9, CG1: 27.6, CG2: 18.0         |
| V24 | 175.6 | 61.6 | 35.8 | 128.5 | CG1: 22.5, CG2: 21.8                    |
| I25 | 173.8 | 61.2 | 43.3 | 127.9 | CD1: 16.2, CG1: 28.4, 19.4              |
| D26 | 180.4 | 58.9 | 41.5 | 128.4 |                                         |
| A27 | 175.6 | 52.5 | 24.2 | 128.2 |                                         |
| W28 |       | 56.0 | 32.2 | 121.6 | CG: 111.0, CD1: 129.8                   |
| V34 | 180.0 | 57.8 | 32.0 | 125.6 | CG1: 21.1, CG2: 21.0                    |
| G35 | 169.9 | 45.1 |      | 110.8 |                                         |
| I36 | 175.8 | 61.3 | 43.2 | 117.3 |                                         |
| E37 | 176.9 | 55.5 | 36.1 | 132.1 | CG: 36.4                                |
| L38 | 175.9 | 56.7 | 45.5 | 131.4 | CG: 28.2                                |
| L39 | 175.9 | 54.2 | 48.2 | 127.6 | CG: 27.9, CD1: 27.3                     |
| A40 | 176.8 | 52.8 | 22.2 | 123.1 |                                         |
| I41 | 173.9 | 61.6 | 42.1 | 125.2 | CG1: 28.3                               |
| E42 | 176.8 | 55.6 | 35.8 | 132.1 |                                         |
| A43 | 176.0 | 51.5 | 24.6 | 126.6 |                                         |
| R44 | 179.9 | 58.9 | 36.6 | 126.4 | CG: 28.7, NE: 88.7                      |
| I45 | 175.8 | 60.8 | 42.8 | 128.4 | CG1: 28.6, CD1: 16.0                    |
| V46 | 175.5 | 61.4 | 35.1 | 129.3 | CG1: 21.3, CG2: 19.6                    |
| I47 | 175.5 | 60.9 | 42.3 | 127.6 | CG1: 27.8, CG2: 17.5, CD1: 14.8         |
| A48 | 175.6 | 52.6 | 24.3 | 128.1 |                                         |

|      |       |      |      |       |
|------|-------|------|------|-------|
| A48x | 175.6 | 52.4 | 24.3 |       |
| S49  | 175.5 | 57.3 | 65.4 | 116.7 |
| S49x | 175.4 | 57.1 | 65.9 | 115.0 |
| V50  | 178.4 | 69.3 | 31.6 | 121.5 |
| E51  | 180.1 | 61.3 | 30.6 | 121.1 |
| T52  | 176.8 | 67.6 | 68.3 | 120.5 |
| T52x | 175.8 | 68.0 | 69.4 | 120.9 |
| Y53  | 178.5 | 63.8 | 39.6 | 127.1 |
| Y53x | 178.3 | 64.1 | 39.4 | 127.9 |
| L54  | 178.6 | 58.6 | 41.8 | 120.4 |
| K55  | 180.4 | 60.5 | 32.9 | 122.0 |
| Y56  | 175.9 | 61.8 | 38.2 | 123.2 |
| Y56x |       | 61.3 | 37.9 |       |
| A57  | 180.2 | 55.6 | 20.9 | 124.3 |
| A57x |       |      |      | 124.1 |
| E58  | 180.1 | 58.7 | 30.4 | 123.9 |
| A59  | 180.5 | 55.4 | 20.9 | 124.2 |
| V60  | 176.9 | 62.9 | 32.8 | 107.7 |
| G61  | 175.5 | 46.2 |      | 110.3 |
| L62  | 175.4 | 55.0 | 48.1 | 121.4 |
| T63  | 174.2 | 60.9 | 70.0 | 113.6 |
| Q64  | 180.4 | 61.2 | 30.5 | 120.9 |
| S65  | 175.7 | 58.6 | 65.9 | 121.3 |
| A66  | 180.4 | 55.3 | 19.2 | 124.3 |
| P69  | 175.5 | 57.0 | 31.4 | 136.7 |

CG1: 25.3, CG2: 22.5

CG: 37.9, CD: 184.3

CG2: 23.4

CG: 130.4, CD: 133.4, CE: 119.0, CZ: 160.2

CG: 27.3

CG: 26.1, CD: 30.5, CE: 43.0, NZ: 36.0

CG: 129.4, CE: 119.6

CG1: 20.9, CG2: 18.0

CG: 27.8, CD1: 24.2, CD2: 23.7

CG2: 23.2

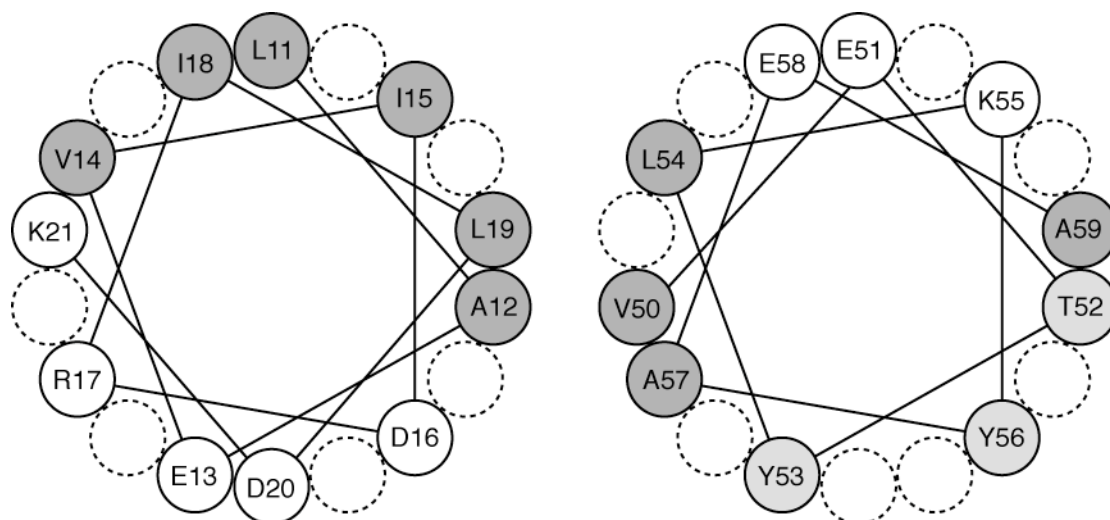

**Figure S1. Helical wheels for the two  $\alpha$ -helices in GvpA. Shading distinguishes between ionizable (white), other polar (light gray), and non-polar (dark gray) residues.**
